# Supplementary material
Source: MDPI journal article supplement (https://www.mdpi.com/2073-4395/10/11/1833)
Supplement: s1 [file s1]

# SUPPLEMENTARY MATERIAL

**Manuscript title:** Distribution of TiO<sub>2</sub> Nanoparticles in Acidic and Alkaline Soil and Their Accumulation by *Aspergillus niger*

**Authors:** Martin Šebesta <sup>a,\*</sup>, Lucia Nemček <sup>a</sup>, Martin Urík <sup>a</sup>, Marek Kolenčík <sup>b,c</sup>, Marek Bujdoš <sup>a</sup>, Peter Matúš <sup>a</sup>

## **Affiliation:**

<sup>a</sup> Institute of Laboratory Research on Geomaterials, Faculty of Natural Sciences, Comenius University in Bratislava, Ilkovičova 6, 842 15 Bratislava, Slovakia

<sup>b</sup> Department of Soil Science and Geology, Faculty of Agrobiological Sciences, Slovak University of Agriculture in Nitra, Trieda A. Hlinku 2, 949 76 Nitra, Slovakia

<sup>c</sup> Nanotechnology Centre, VŠB Technical University of Ostrava, 17. listopadu 15/2172 708 33 Ostrava, Czech Republic

\* Corresponding author. Tel.: +421 2 602 96 557. Corresponding address in Slovak: Ústav laboratorného výskumu geomateriálov, Prírodovedecká fakulta, Univerzita Komenského v Bratislave, Ilkovičova 6, 84215 Bratislava, Slovenská republika, E-mail address: martin.sebesta@uniba.sk,

**Number of pages: 3**

## **1. Artificial rainwater**

The batch sorption of TiO<sub>2</sub> nanoparticles on the soil samples CH-cc and CM-st.dy was conducted with a background electrolyte with concentrations of ions typical for the Slovak rainwaters. This electrolyte was also used in our previous work [1]. The concentrations of mono- and divalent cations and anions were based on the average of five-year measurements

(2011-2015) made at five meteorological stations placed within different parts of Slovakia [2]. The prepared thousand-fold artificial rainwater concentrate had following chemical composition: 0.2705 g.L<sup>-1</sup> of NaCl, 1.2397 g.L<sup>-1</sup> of (NH<sub>4</sub>)<sub>2</sub>SO<sub>4</sub>, 0.3044 g.L<sup>-1</sup> of NaNO<sub>3</sub>, and 1.5096 g.L<sup>-1</sup> of Ca(NO<sub>3</sub>)<sub>2</sub>. Artificial rainwater was created by adding 0.1 mL of the artificial rainwater concentrate to 99.9 mL of distilled water.

## 2. Soil properties

The two soil samples were used in our previous work [1] and their characteristics can be viewed below (Table S1).

Table S1. Characteristics of Calcic Chernozem (CH-cc) and Dystric Stagnic Cambisol (CM-st.dy) soil samples.

|                     | CH-cc | CM-st.dy   |                                           | CH-cc | CM-st.dy |
|---------------------|-------|------------|-------------------------------------------|-------|----------|
| Soil code [3]       | CH-cc | CM-st.dy   | pH <sub>KCl</sub>                         | 7.45  | 3.40     |
| Land use            | Crop  | Forest     | CaCO <sub>3</sub> [%]                     | 3.3   | 0.4      |
| Texture             | loam  | loamy sand | Tot Al [mg.g <sup>-1</sup> ] <sup>d</sup> | 51.8  | 44.6     |
| Sand [%]            | 34.3  | 79.2       | Tot Fe [mg.g <sup>-1</sup> ] <sup>d</sup> | 25.7  | 16.2     |
| Silt [%]            | 45.8  | 16.4       | Tot Mn [µg.g <sup>-1</sup> ] <sup>d</sup> | 604   | 318      |
| Clay [%]            | 19.9  | 4.5        | Tot Ti [mg.g <sup>-1</sup> ]              | 3.66  | 3.31     |
| TOC [%]             | 2.82  | 4.73       | Tot Zn [µg.g <sup>-1</sup> ] <sup>d</sup> | 82.4  | 142.0    |
| HS [%] <sup>a</sup> | 1.12  | 2.48       | Ox Al [mg.g <sup>-1</sup> ] <sup>e</sup>  | 0.92  | 1.56     |
| HA [%] <sup>b</sup> | 0.53  | 0.79       | Ox Fe [mg.g <sup>-1</sup> ] <sup>e</sup>  | 1.27  | 2.97     |
| FA [%] <sup>c</sup> | 0.59  | 1.69       | Ox Mn [mg.g <sup>-1</sup> ] <sup>e</sup>  | 0.39  | 0.32     |
| pH <sub>H2O</sub>   | 7.98  | 4.10       | CEC [mmol.kg <sup>-1</sup> ] <sup>f</sup> | 484   | 291      |

CH-cc – Calcic Chernozem, CM-st.dy – Dystric Stagnic Cambisol, <sup>a</sup> Humic substances, <sup>b</sup> Humic acids, <sup>c</sup> Fulvic acids, <sup>d</sup> Total concentration in the soil sample, <sup>e</sup> Oxalate-extractable phase of the element, <sup>f</sup> Cation exchange capacity

38   **References:**

- 39    1.     Šebesta, M.; Nemček, L.; Urik, M.; Kolenčík, M.; Bujdoš, M.; Vávra, I.; Dobročka, E.;  
40         Matúš, P. Partitioning and stability of ionic, nano- and micro-sized zinc in natural soil  
41         suspensions. *Sci. Total Environ.* **2020**, *700*, 134445,  
42         doi:<https://doi.org/10.1016/j.scitotenv.2019.134445>.
- 43    2.     SHMÚ. Správa o kvalite ovzdušia a podiele jednotlivých zdrojov na jeho znečisťovaní  
44         v SR Available online: <http://www.shmu.sk/sk/?page=997>.
- 45    3.     IUSS Working Group WRB *World Reference Base for Soil Resources 2014, update*  
46         *2015 International soil classification system for naming soils and creating legends for*  
47         *soil maps. World Soil Resources Reports No. 106*; FAO, Rome, 2015;

48
